# Supplementary material
Source: PubMed Central journal article supplement (PMC3143572)
Supplement: NIHMS309615-supplement-supplement_1.pdf [file NIHMS309615-supplement-supplement_1.pdf]

## Online Appendix

| <b>Appendix 1. Symptom Severity by Group (N=4512)</b> |                                         |                                        |                                           |
|-------------------------------------------------------|-----------------------------------------|----------------------------------------|-------------------------------------------|
|                                                       | <b>High Symptom Burden<br/>(n=1399)</b> | <b>Low Symptom Burden<br/>(n=3113)</b> | <b>Effect Size<br/>(Cohen's <i>d</i>)</b> |
|                                                       | <b>Mean (95% CI)</b>                    | <b>Mean (95% CI)</b>                   |                                           |
| <b>RSCL-M</b>                                         |                                         |                                        |                                           |
| Tiredness                                             | 62.55 (61.12-63.98)                     | 27.46 (26.72-28.20)                    | 1.51                                      |
| Lack of energy                                        | 61.06 (59.60-62.53)                     | 24.47 (23.71-25.23)                    | 1.54                                      |
| Difficulty sleeping                                   | 49.74 (48.03-51.46)                     | 20.52 (19.68-21.36)                    | 1.08                                      |
| Decreased sexual interest                             | 47.31 (45.29-49.33)                     | 26.77 (25.67-27.87)                    | 0.61                                      |
| Low back pain                                         | 42.13 (40.34-43.92)                     | 17.97 (17.15-18.79)                    | 0.89                                      |
| Sore muscles                                          | 42.05 (40.39-43.70)                     | 16.55 (15.81-17.29)                    | 1.03                                      |
| Pain (other than low back pain)                       | 41.60 (39.85-43.35)                     | 15.28 (14.52-16.04)                    | 1.02                                      |
| Shortness of breath                                   | 32.00 (30.37-33.63)                     | 10.28 (9.61-10.95)                     | 0.92                                      |
| Tingling hands or feet                                | 30.90 (29.17-32.63)                     | 12.21 (11.45-12.97)                    | 0.72                                      |
| Weight gain                                           | 29.63 (27.82-31.44)                     | 17.09 (16.25-17.93)                    | 0.45                                      |
| Heartburn/belching                                    | 27.31 (25.74-28.89)                     | 11.36 (10.69-12.03)                    | 0.70                                      |
| Dry mouth                                             | 27.31 (25.72-28.90)                     | 9.38 (8.73-10.03)                      | 0.79                                      |
| Problems controlling your urine                       | 26.05 (24.42-27.68)                     | 13.85 (13.11-14.59)                    | 0.49                                      |
| Headaches                                             | 25.55 (24.05-27.04)                     | 7.34 (6.79-7.89)                       | 0.89                                      |
| Constipation                                          | 23.65 (22.06-25.25)                     | 9.21 (8.56-9.86)                       | 0.63                                      |
| Coughing                                              | 23.45 (21.95-24.95)                     | 8.59 (7.96-9.22)                       | 0.68                                      |
| Abdominal aches                                       | 22.01(20.56-23.47)                      | 5.95 (5.46-6.44)                       | 0.83                                      |
| Lack of appetite                                      | 19.46 (17.99-20.93)                     | 3.83 (3.42-4.24)                       | 0.85                                      |
| Dizziness                                             | 19.11 (17.83-20.39)                     | 4.24 (3.83-4.65)                       | 0.89                                      |
| Loss of hair                                          | 18.87 (17.20-20.54)                     | 5.57 (4.96-6.18)                       | 0.58                                      |
| Swelling of arms or legs                              | 18.31 (16.85-19.76)                     | 5.60 (5.09-6.11)                       | 0.65                                      |
| Skin irritation                                       | 18.19 (16.78-19.60)                     | 6.46 (5.91-7.01)                       | 0.59                                      |
| Diarrhea                                              | 18.00 (16.59-19.41)                     | 5.93 (5.42-6.44)                       | 0.62                                      |
| Problems controlling your bowels                      | 17.52 (16.06-18.98)                     | 5.52 (5.01-6.03)                       | 0.61                                      |
| Burning/sore eyes                                     | 16.69 (15.44-17.93)                     | 4.75 (4.30-5.20)                       | 0.70                                      |
| Nausea                                                | 15.32 (14.03-16.61)                     | 1.99 (1.70-2.28)                       | 0.86                                      |
| Shivering                                             | 13.56 (12.37-14.76)                     | 2.28 (1.97-2.59)                       | 0.77                                      |
| Weight loss                                           | 11.62 (10.40-12.84)                     | 2.98 (2.61-3.35)                       | 0.55                                      |
| Sore mouth/pain when swallowing                       | 9.77 (8.70-10.83)                       | 1.52 (1.25-1.79)                       | 0.64                                      |

| <b>Appendix 1. Symptom Severity by Group (N=4512)</b> |                     |                     |      |
|-------------------------------------------------------|---------------------|---------------------|------|
| Vomiting                                              | 7.36 (6.33-8.39)    | 0.57 (0.41-0.73)    | 0.59 |
| <b>POMS-37</b>                                        |                     |                     |      |
| Vigorous <sup>a</sup>                                 | 82.93 (81.77-84.09) | 58.41 (57.43-59.39) | 0.93 |
| Full of pep <sup>a</sup>                              | 81.91 (80.72-83.10) | 51.86 (50.94-52.78) | 1.19 |
| Energetic <sup>a</sup>                                | 76.05 (74.88-77.22) | 47.65 (46.79-48.51) | 1.19 |
| Lively <sup>a</sup>                                   | 70.27 (69.07-71.47) | 43.24 (42.42-44.06) | 1.16 |
| Active <sup>a</sup>                                   | 64.58 (63.31-65.85) | 38.46 (37.64-39.28) | 1.11 |
| Fatigued                                              | 62.51 (61.17-63.85) | 27.20 (26.49-27.91) | 1.62 |
| Worn-out                                              | 62.20 (60.84-63.57) | 25.95 (25.24-26.66) | 1.64 |
| Cheerful <sup>a</sup>                                 | 60.79 (59.62-61.97) | 35.12 (34.36-35.88) | 1.17 |
| Exhausted                                             | 57.29 (55.82-58.77) | 20.75 (20.06-21.44) | 1.61 |
| Bushed                                                | 52.45 (50.95-53.94) | 19.27 (18.60-19.94) | 1.48 |
| Weary                                                 | 48.55 (47.15-49.96) | 16.71 (16.08-17.34) | 1.51 |
| Uncertain about things                                | 44.98 (43.55-46.40) | 16.66 (16.03-17.29) | 1.34 |
| Tense                                                 | 44.47 (43.05-45.88) | 17.41 (16.80-18.02) | 1.30 |
| Sad                                                   | 43.91 (42.50-45.32) | 12.27 (11.76-12.78) | 1.64 |
| Unhappy                                               | 43.49 (42.20-44.79) | 14.96 (14.39-15.53) | 1.48 |
| Restless                                              | 43.05 (41.71-44.38) | 15.75 (15.16-16.34) | 1.36 |
| Discouraged                                           | 41.47 (40.04-42.91) | 8.87 (8.40-9.34)    | 1.72 |
| Blue                                                  | 40.97 (39.57-42.37) | 9.99 (9.50-10.48)   | 1.65 |
| Nervous                                               | 40.64 (39.17-42.11) | 12.29 (11.74-12.84) | 1.40 |
| Forgetful                                             | 40.03 (38.62-41.45) | 20.29 (19.62-20.96) | 0.91 |
| Anxious                                               | 39.89 (38.47-41.31) | 15.41 (14.76-16.06) | 1.15 |
| On edge                                               | 39.66 (38.29-41.04) | 11.26 (10.73-11.79) | 1.49 |
| Annoyed                                               | 37.97 (36.63-39.30) | 13.04 (12.51-13.57) | 1.32 |
| Grouchy                                               | 35.86 (34.51-37.21) | 13.02 (12.49-13.55) | 1.20 |
| Unable to concentrate                                 | 35.70 (34.37-37.03) | 11.49 (10.88-12.10) | 1.20 |
| Uneasy                                                | 33.92 (32.61-35.23) | 8.29 (7.84-8.74)    | 1.45 |
| Angry                                                 | 33.89 (32.49-35.28) | 10.87 (10.36-11.38) | 1.19 |
| Peeved                                                | 30.96 (29.60-32.32) | 9.09 (8.60-9.58)    | 1.19 |
| Miserable                                             | 30.79 (29.34-32.24) | 3.07 (2.76-3.38)    | 1.62 |
| Confused                                              | 28.98 (27.58-30.38) | 6.21 (5.74-6.68)    | 1.23 |
| Helpless                                              | 28.81 (27.33-30.29) | 3.73 (3.38-4.08)    | 1.40 |
| Hopeless                                              | 26.32 (24.85-27.78) | 2.24 (1.97-2.51)    | 1.42 |

| <b>Appendix 1. Symptom Severity by Group (N=4512)</b> |                     |                  |      |
|-------------------------------------------------------|---------------------|------------------|------|
| Resentful                                             | 26.15 (24.74-27.57) | 4.91 (4.50-5.32) | 1.19 |
| Worthless                                             | 23.72 (22.20-25.24) | 1.91 (1.64-2.18) | 1.26 |
| Bewildered                                            | 23.33 (22.05-24.60) | 3.34 (3.01-3.67) | 1.27 |
| Bitter                                                | 23.33 (21.87-24.79) | 2.65 (2.36-2.94) | 1.21 |
| Furious                                               | 18.92 (17.55-20.29) | 2.06 (1.81-2.31) | 1.07 |

CI indicates confidence interval; RSCL-M, Modified Rotterdam Checklist; POMS-37, short form of the Profile of Mood States.

<sup>a</sup> Reverse scored.

**Appendix 2.** Composite Scores of RSCL-M Factors and POMS-37 Subscales in Cancer Survivors with High Symptom Burden (Mean (SD))

| RSCL-M Factors                 | Total<br>(n=1399) | Chemotherapy         |                            | Radiotherapy         |                   |
|--------------------------------|-------------------|----------------------|----------------------------|----------------------|-------------------|
|                                |                   | Completed<br>(n=523) | Active<br>(n=212)          | Completed<br>(n=460) | Active<br>(n=137) |
| Fatigue                        | 61.81 (26.40)     | 64.96 (26.18)        | 66.12 (25.88)              | 63.97 (23.35)        | 64.36 (28.16)     |
| Pain                           | 40.21 (21.86)     | 41.60 (22.30)        | 39.15 (21.36)              | 39.17 (21.23)        | 43.06 (23.00)     |
| Lung symptoms                  | 27.73 (25.12)     | 27.08 (25.25)        | 30.90 (26.72)              | 27.68 (25.94)        | 32.97 (25.04)     |
| Weight change                  | 20.24 (16.20)     | 21.64 (15.96)        | 22.48 (18.00)              | 21.31 (16.73)        | 23.56 (17.91)     |
| Treatment-related symptoms     | 19.89 (14.80)     | 22.67 (15.41)        | 21.33 (15.67)              | 20.41 (14.45)        | 24.33 (17.45)     |
| Bowel/bladder control problems | 19.18 (20.95)     | 19.22 (21.13)        | 23.72 (23.09)              | 18.47 (21.40)        | 24.17 (23.49)     |
| Nausea                         | 11.34 (20.12)     | 11.81 (20.02)        | 17.22 (26.33) <sup>a</sup> | 11.02 (19.57)        | 14.12 (22.96)     |
| <b>POMS-37 Subscales</b>       |                   |                      |                            |                      |                   |
| Vigor                          | 72.76 (16.34)     | 72.17 (17.04)        | 74.90 (15.67)              | 72.28 (16.57)        | 71.20 (17.84)     |
| Fatigue                        | 56.60 (22.21)     | 57.73 (23.05)        | 58.74 (20.78)              | 56.76 (21.78)        | 57.25 (23.33)     |
| Tension                        | 40.27 (20.26)     | 38.95 (19.96)        | 38.40 (21.24)              | 37.80 (19.42)        | 41.13 (21.60)     |
| Depression                     | 34.94 (20.93)     | 33.47 (21.27)        | 34.33 (20.78)              | 32.86 (20.22)        | 33.93 (21.27)     |
| Confusion                      | 34.60 (18.60)     | 35.50 (19.27)        | 33.36 (18.88)              | 32.92 (18.15)        | 34.76 (19.14)     |
| Anger                          | 29.58 (20.57)     | 28.61 (20.64)        | 26.84 (20.19)              | 27.39 (19.64)        | 29.04 (21.77)     |

RSCL-M indicates Modified Rotterdam Checklist; POMS-37, short form of the Profile of Mood States; SD, standard deviation.

<sup>a</sup> Significant at  $P = .005$ , after controlling for demographic, socioeconomic, and disease characteristics.
